# Supplementary material for: Design, Fabricate and Test an Automatic Toilet Seat
Source: Royal Society of Chemistry journal article supplement (doi:10.1039/c5cc01828e), 1988-01-01
Supplement: c5cc01828e1.pdf [file c5cc01828e1.pdf]

## Electronic Supplementary Information

### Creating Extra Pores in Microporous Carbon via a Template Strategy for Remarkable Enhancement of Ambient-Pressure CO<sub>2</sub> Uptake

Baiyan Li,<sup>a</sup> Yiming Zhang,<sup>a,b,\*</sup> Dingxuan Ma,<sup>b</sup> Liangkui Zhu,<sup>b</sup> Daliang Zhang,<sup>b</sup> Matthew  
Chrzanowski,<sup>a</sup> Zhan Shi<sup>b</sup> and Shengqian Ma<sup>a,\*</sup>

<sup>a</sup>Department of Chemistry, University of South Florida, 4202 East Fowler Avenue,  
Tampa, Florida, 33620, United States, Fax: +1 813-974-3203; Tel: +1 813-974-5217;

<sup>b</sup>State Key Laboratory of Inorganic Synthesis and Preparative Chemistry, College of  
Chemistry, Jilin University, Changchun 130012, People's Republic of China

E-mail: sqma@usf.edu; zhangyiming0805@gmail.com

## 1. Experimental Details

All reagents were purchased from Sigma-Aldrich or Alfa and used as received unless otherwise indicated. Tetrakis(4-bromophenyl)silane<sup>[1]</sup> and PPN-4<sup>[2]</sup> were synthesized according to the procedures reported in literature.

### 1.1 Synthesis of PPN-4

To a solution of 2,2'-bipyridyl (1.41 g, 9.04 mmol), bis(1,5-cyclooctadiene)nickel(0) (Ni(COD)<sub>2</sub>, 2.5 g, 9.04 mmol), and 1,5-cyclooctadiene (COD, 0.18 mL, 9.12 mmol) in anhydrous DMF/THF (150 mL/225 mL) add tetrakis(4-bromophenyl)silane (1.27 g, 2.0 mmol), and the mixture was stirred at room temperature under argon atmosphere overnight. Then, the mixture was cooled in ice bath, 6 mol/L HCl solution (125 mL) was added, the resulting mixture was stirred for another 12 h. the precipitate was collected, then washed with Methanol (6 × 100 mL), and H<sub>2</sub>O (6 × 100 mL), respectively, and dried in vacuo to produce PPN-4 as off-white powder.

### 1.2 Synthesis of PPN-4/C600

The powder of PPN-4 was heat-treated in a horizontal quartz reactor under an N<sub>2</sub> flow, and heated to 600 °C with a heating rate of 5 °C/min, the sample was pyrolyzed at 600 °C for 8 h to afford the carbon material designated as PPN-4/C600-Si. Then the obtained PPN-4/C600-Si was soaked into a 2 M KOH solution at 120 °C under hydrothermal conditions for two days followed by washing with water and methanol to afford the final microporous carbon material designated as PPN-4/C600.

### 1.3 Synthesis of PPN-4/C800 and PPN-4/C1000

The synthesis procedures of PPN-4/C800 and PPN-4/C1000 were similar to PPN-4/C600 except the heat-treated temperature at 800 °C and 1000 °C respectively.

## 2. Characterizations

PXRD patterns were collected on a Bruker D8 Advance X-ray diffractometer. Gas sorption experiments were carried out on a surface area analyzer ASAP-2020. N<sub>2</sub> gas

sorption isotherms were measured at 77 K using a liquid N<sub>2</sub> bath. CO<sub>2</sub> sorption isotherms were collected at 273 K using a water-ice bath and at 295 K with a water bath. Prior to the measurements, the samples were degassed for 10 h at 180 °C.

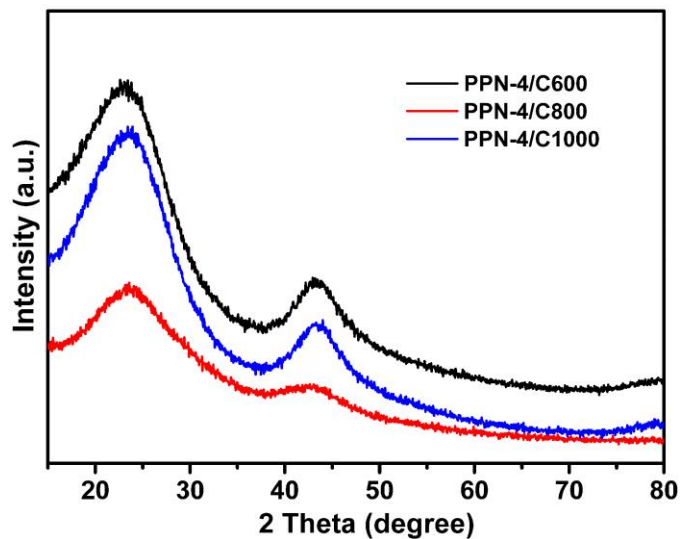

**Fig. S1.** Powder XRD patterns of the porous carbons PPN-4/C600, PPN-4/C800 and PPN-4/C1000.

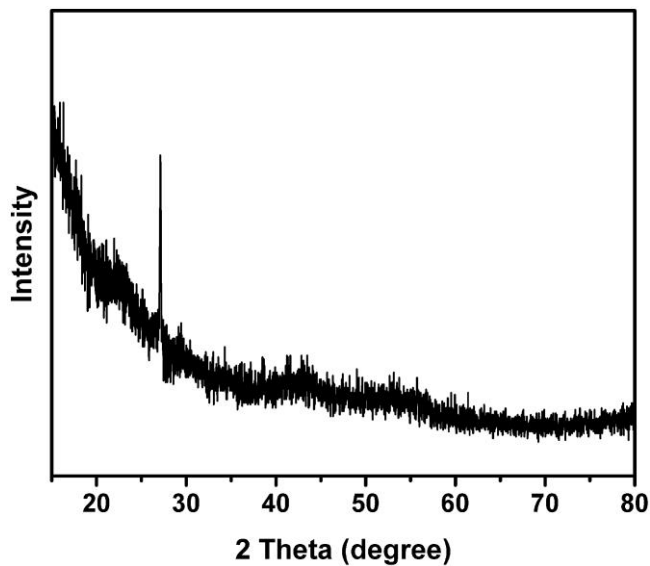

**Fig. S2.** Powder XRD patterns of the PPN-4.

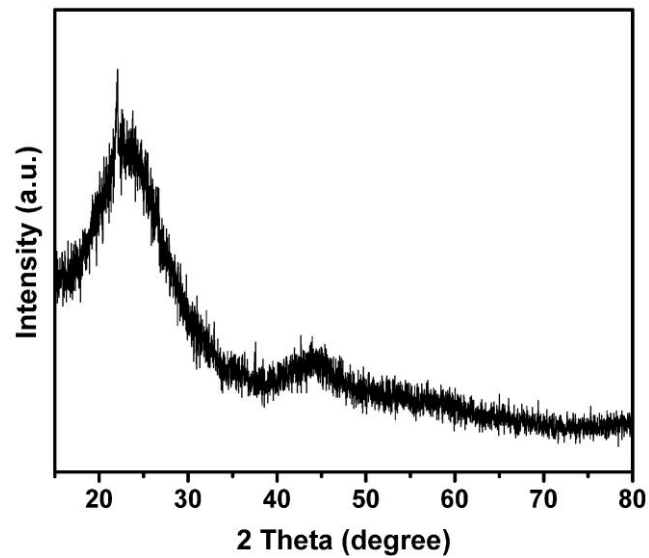

**Fig. S3.** Powder XRD patterns of the PPN-4/C600-Si.

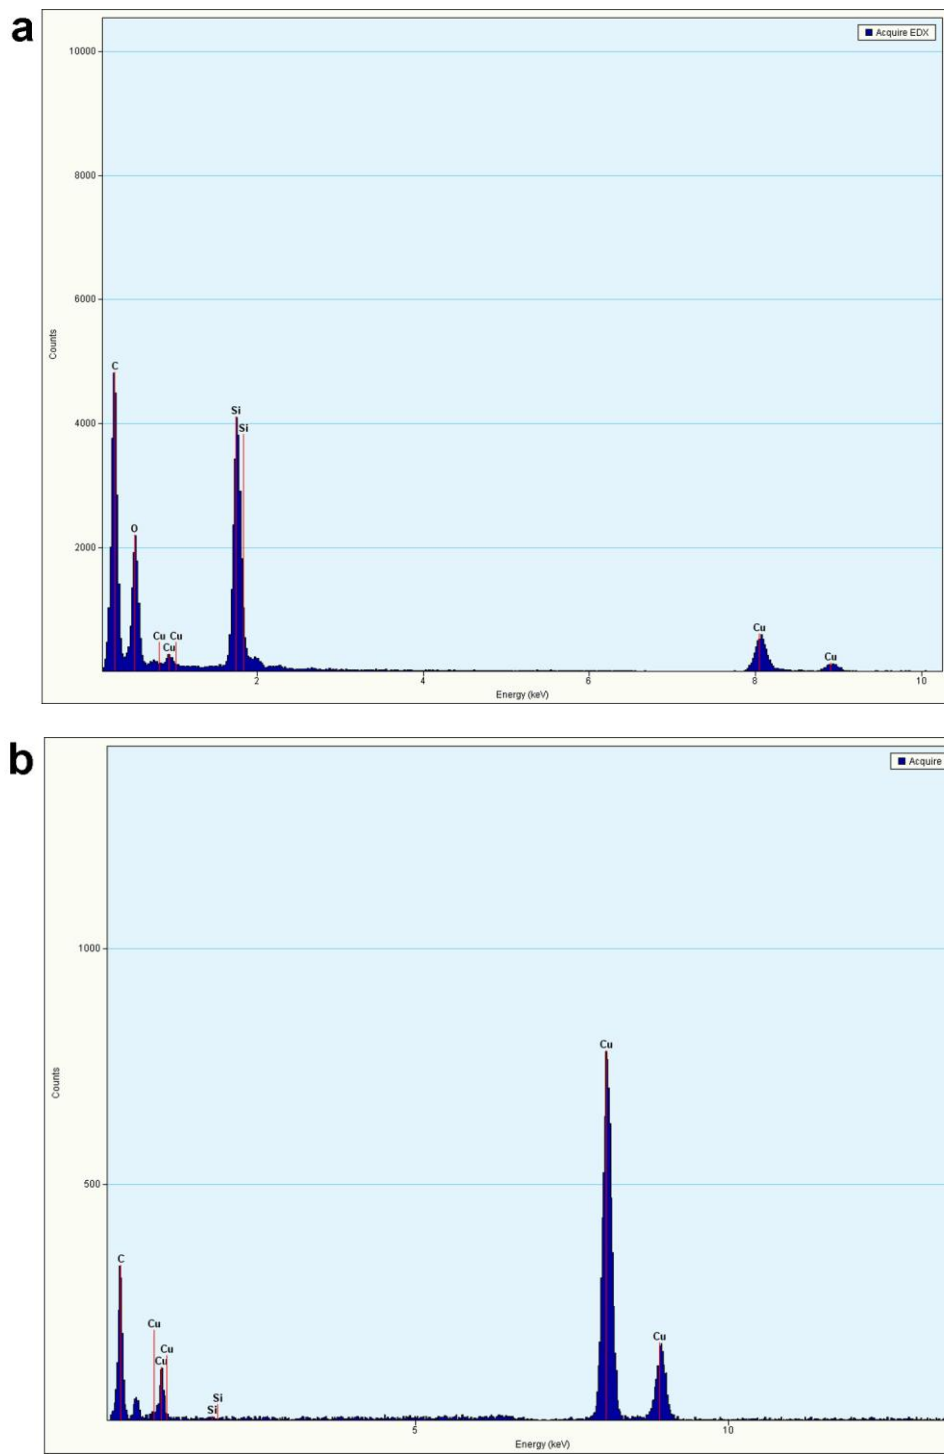

**Fig. S4.** The comparison of EDS analysis of PPN-4/C600-Si (a) and PPN-4/C600 (b).

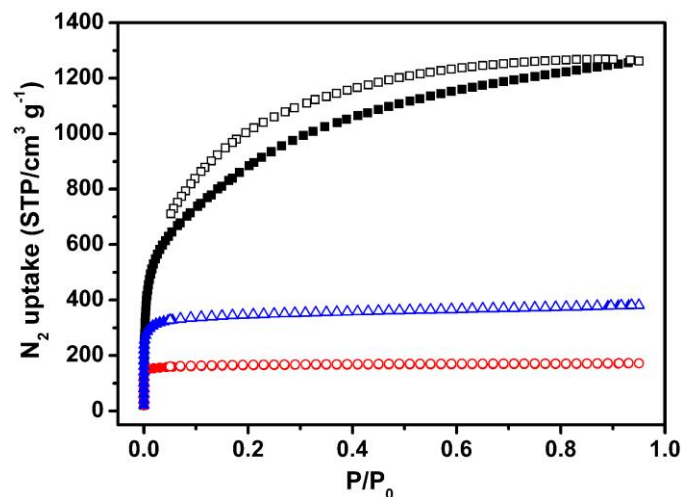

**Fig. S5.** N<sub>2</sub> sorption isotherms for PPN-4, PPN-4/C600-Si and PPN-4/C600. (adsorption: filled; desorption: open; PPN-4: black squares; PPN-4/C600-Si: red circles; PPN-4/C600: blue triangles).

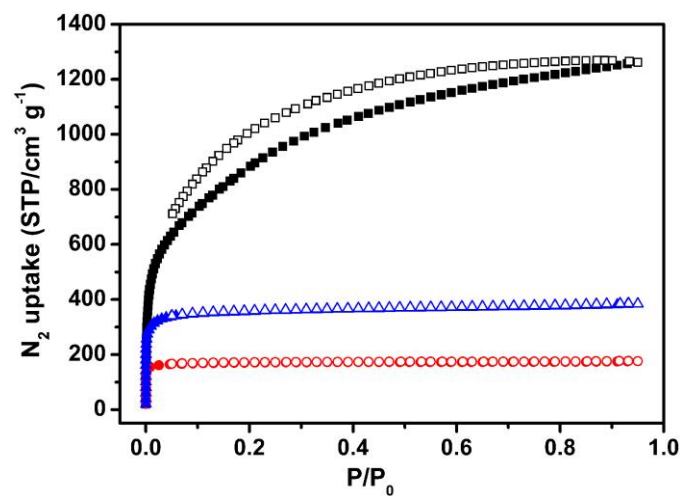

**Fig. S6.** N<sub>2</sub> sorption isotherms for PPN-4, PPN-4/C800-Si and PPN-4/C800. (adsorption: filled; desorption: open; PPN-4: black squares; PPN-4/C800-Si: red circles; PPN-4/C800: blue triangles).

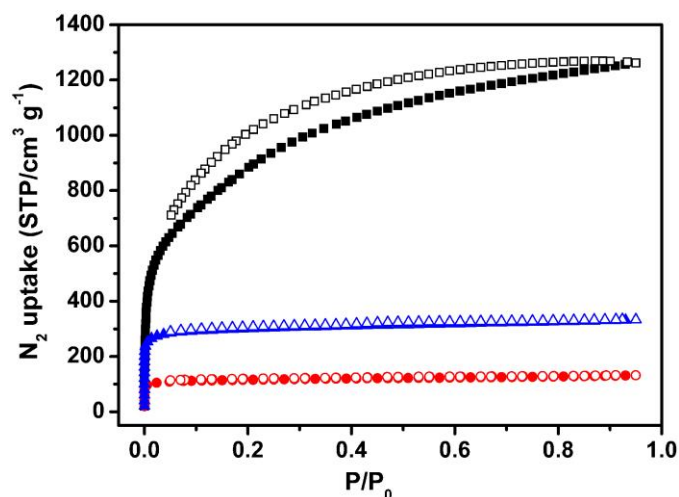

**Fig. S7.** N<sub>2</sub> sorption isotherms for PPN-4, PPN-4/C1000-Si and PPN-4/C1000. (adsorption: filled; desorption: open; PPN-4: black squares; PPN-4/C1000-Si: red circles; PPN-4/C1000: blue triangles).

**Table S1** Surface areas/pore sizes of PPN-4 and carbonized samples

| Sample         | $S_{\text{BET}}^{\text{a}}$ (m <sup>2</sup> g <sup>-1</sup> ) | Pore size <sup>b</sup> (nm) |
|----------------|---------------------------------------------------------------|-----------------------------|
| PPN-4          | 2882                                                          | 12.7                        |
| PPN-4/C600-Si  | 636                                                           | 5.0                         |
| PPN-4/C600     | 1323                                                          | 4.7                         |
| PPN-4/C800-Si  | 662                                                           | 5.2                         |
| PPN-4/C800     | 1373                                                          | 4.8                         |
| PPN-4/C1000-Si | 443                                                           | 5.2                         |
| PPN-4/C1000    | 1152                                                          | 4.8                         |

<sup>a</sup>  $S_{\text{BET}}$  was calculated in the partial pressure ( $P/P_0$ ) range of 0.01 to 0.1 which gives the best linearization.

<sup>b</sup> Maxima of the pore size distributions calculated using the Horvath-Kawazoe (HK) model for microporous carbon and DFT model for PPN-4.

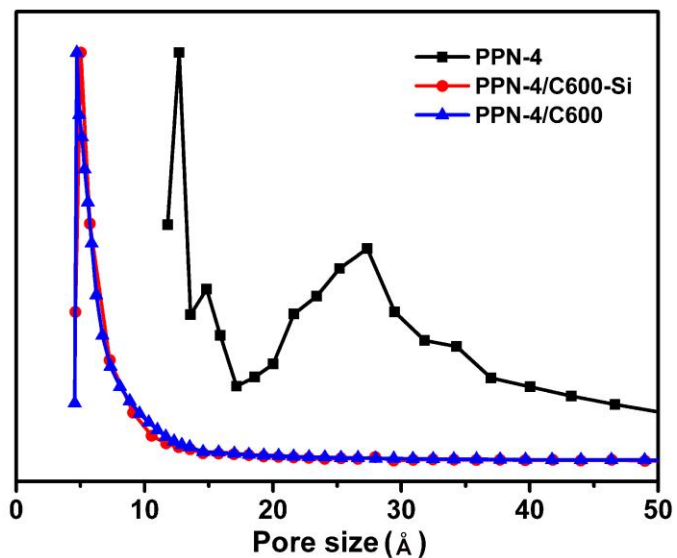

**Fig. S8.** Pore size distributions for PPN-4, PPN-4/C600-Si and PPN-4/C600.

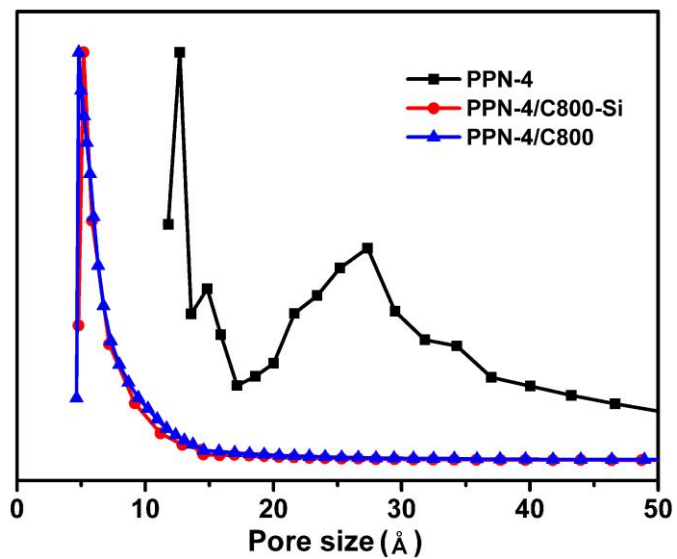

**Fig. S9.** Pore size distributions for PPN-4, PPN-4/C800-Si and PPN-4/C800.



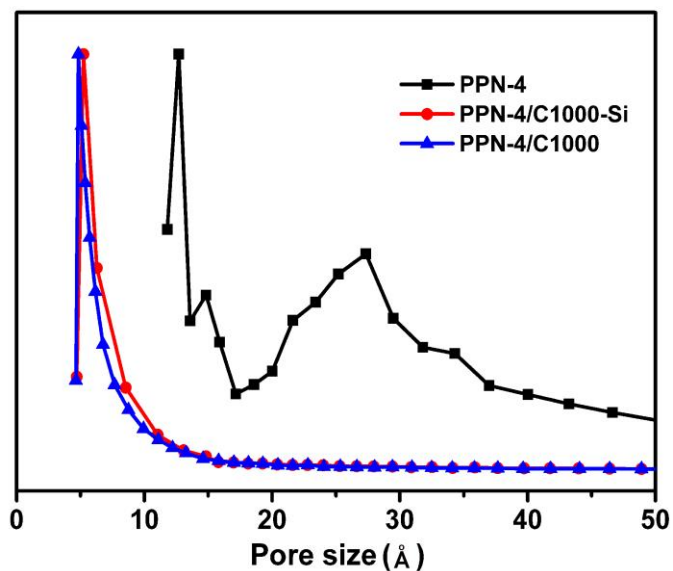

**Fig. S10.** Pore size distributions for PPN-4, PPN-4/C1000-Si and PPN-4/C1000.

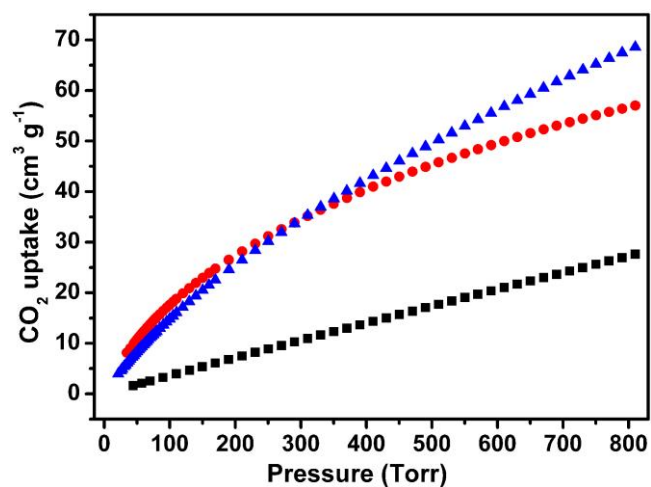

**Fig. S11.** CO<sub>2</sub> adsorption isotherms of PPN-4, PPN-4/C800-Si and PPN-4/800 at 298 K.  
(PPN-4: black squares; PPN-4/C800-Si: red circles; PPN-4/800: blue triangle)

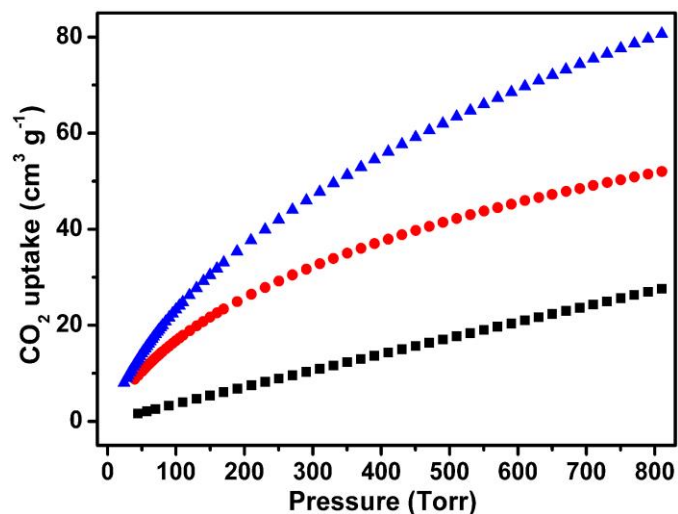

**Fig. S12.** CO<sub>2</sub> adsorption isotherms of PPN-4, PPN-4/C1000-Si and PPN-4/C1000 at 298 K. (PPN-4: black squares; PPN-4/C1000-Si: red circles; PPN-4/C1000: blue triangle).

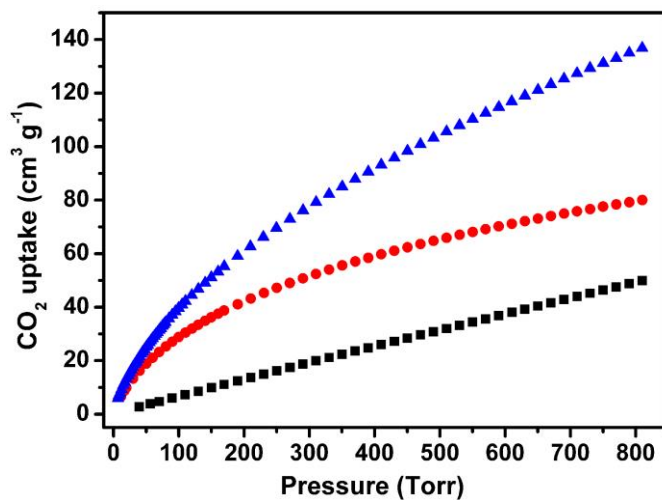

**Fig. S13.** CO<sub>2</sub> adsorption isotherms of PPN-4, PPN-4/C600-Si and PPN-4/C600 at 273 K. (PPN-4: black squares; PPN-4/C600-Si: red circles; PPN-4/C600: blue triangle).

## References

- (1) M. Wander, P. J. C. Hausoul, L. A. J. M. Sliedregt, B. J. van Steen, G. van Koten and R. J. M. Klein Gebbink, *Organometallics*, 2009, **28**, 4406.
- (2) D. Yuan, W. Lu, D. Zhao and H.-C. Zhou, *Adv. Mater.*, 2011, **23**, 3723.
